# Supplementary material for: An Al–Li alloy/water system for superior and low-temperature hydrogen production
Source: Royal Society of Chemistry journal article supplement (doi:10.1039/d1qi00487e), 2021-01-01
Supplement: d1qi00487e1.pdf [file d1qi00487e1.pdf]

## Electronic Supplementary Information (ESI)

### An Al-Li alloy/water system for superior and low-temperature hydrogen production

Mili Liu<sup>a</sup>, Hui Liu<sup>b</sup>, Kang Chen<sup>a</sup>, Jiangyong Sun<sup>c\*</sup>, Hui Wang<sup>a</sup>, Jiangwen Liu<sup>a</sup>,

Liuzhang Ouyang<sup>a,d\*</sup>

<sup>a</sup>School of Materials and Engineering, Guangdong Provincial Key Laboratory of Advanced Energy Storage Materials, South China University of Technology, Guangzhou, 510641, PR China, E-mail address: meouyang@scut.edu.cn.

<sup>b</sup>School of Chemistry and Material Science, Hunan Agricultural University, Changsha, 410128, PR China.

<sup>c</sup>Institute of Materials and Processing, Guangdong Academy of Sciences, Guangzhou 510651, China. E-mail address: sunjiangyong@gimp.gd.cn.

<sup>d</sup>China-Australia Joint Laboratory for Energy & Environmental Materials, Key Laboratory of Fuel Cell Technology of Guangdong Province, Guangzhou, 510641, PR China.

## Table of Contents

|                                                                                                                                                                      |     |
|----------------------------------------------------------------------------------------------------------------------------------------------------------------------|-----|
| Table S1. The mass fraction of Al and Li for as-prepared alloys and Alloy 1- $\langle 100 \rangle$ 's hydrolytic by-products from ICP-OES test.....                  | [3] |
| Table S2. Comparison of various Al-based alloys and composites for hydrogen production. Gravimetric H <sub>2</sub> density is calculated without water included..... | [3] |
| Figure S1 (a) XRD pattern of as-prepared Al-17.6%Li alloy; (b) Hydrogen generation curves of Al-17.6%Li alloy with different particle size at 299 K.....             | [4] |
| Figure S2. High resolution X-ray photoelectron spectroscopy (XPS) spectra of Li 1s and Al 2p of (a,c) pristine Al-31.9% alloy and (b,d) hydrolysis by-products. .... | [4] |
| Figure S3. EDS elemental mapping of Al-31.9% alloy.....                                                                                                              | [5] |
| Figure S4. The molten product of the Al-31.9%Li- $\langle 400 \rangle$ during the hydrolysis process and its SEM image was shown in inset. ....                      | [5] |
| Figure S5. SEM images of the solid hydrolysis by-products of (a) Al-31.9%Li- $\langle 100 \rangle$ and (b) Al-31.9%Li- $\langle 400 \rangle$ .. ....                 | [5] |
| Reference.....                                                                                                                                                       | [6] |

Table S1. The mass fraction of Al and Li for as-prepared alloys and Alloy 1- [<100]>'s hydrolytic by-products from ICP-OES test.

| Sample                                    | Al (wt.%) | Li (wt.%) | Al/Li mass fraction ratio |
|-------------------------------------------|-----------|-----------|---------------------------|
| 1                                         | 68.1      | 31.9      | 2.13                      |
| 2                                         | 82.4      | 17.6      | 4.68                      |
| Alloy 1- [<100]>'s hydrolytic by-products | 16.9%     | 8.0%      | 2.11                      |

Table S2. Comparison of various Al-based alloys and composites for hydrogen production. Gravimetric H<sub>2</sub> density is calculated without water included.

| Materials                                                    | H <sub>2</sub> production kinetics | Gravimetric H <sub>2</sub> density | Ea   | References      |
|--------------------------------------------------------------|------------------------------------|------------------------------------|------|-----------------|
| Al-9%Li-4%In-1%Zn                                            | 1214 ml/g in 15 min                | 10.4 wt%                           | 22.5 | 1               |
| Al-19.15%Li                                                  | 645 ml/g in 10min                  | 7.0 wt.%                           | -    | 2               |
| Al-20%Li-5%Sn                                                | 1231ml/g in 1min                   | 11.4 wt.%                          | -    | 3               |
| Al-5%InCl <sub>3</sub> -7%(Ni-Bi-B)                          | 1197 ml/g in 10 min                | 9.8 wt.%                           | 22.4 | 4               |
| Al-15%Bi <sub>2</sub> O <sub>2</sub> CO <sub>3</sub> -5%NaCl | 900 ml/g in 10 min                 | 7.3wt.%                            | 9.4  | 5               |
| Al-15%BiOCl                                                  | 1058 m/g in 5min                   | 8.6wt.%                            | 26.9 | 6               |
| Al-19%(Ca-In-Sn)-1%Cu                                        | <500 ml/g in 10 min                | < 4.1 wt.%                         | 28.0 | 7               |
| Al-graphite-Al(OH) <sub>3</sub>                              | 1360 ml/ g in 20 min               | 11.1 wt.%                          | 27.9 | 8               |
| Al-10%Bi(OH) <sub>3</sub> -5%NaCl                            | 1000 ml/g in 2 min                 | 8.2 wt.%                           | 10.4 | 9               |
| Al-31.9%Li- [<200]>                                          | 1190 ml/g in 30min                 | 9.7 wt.%                           | -    | <b>our work</b> |
| Al-31.9%Li- [<100]>                                          | 1496 ml/g in 0.5 min               | 12.2 wt.%                          | 3.3  | <b>our work</b> |

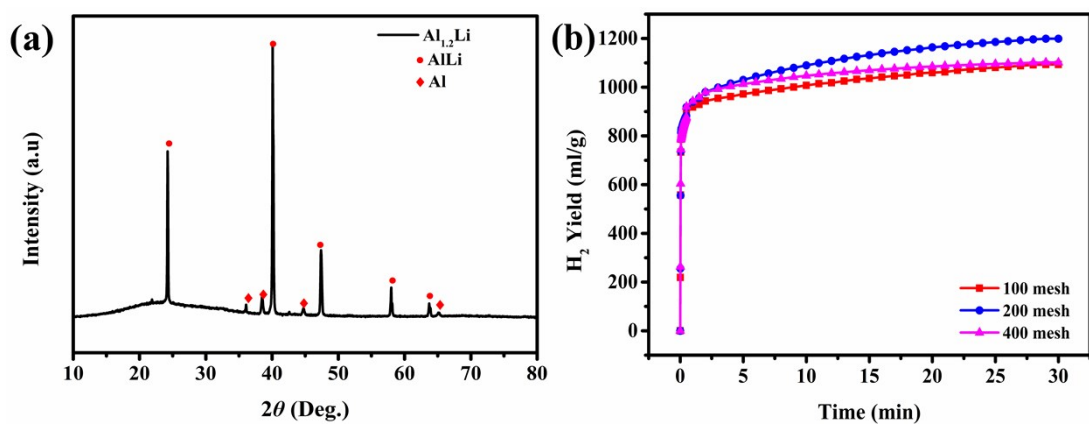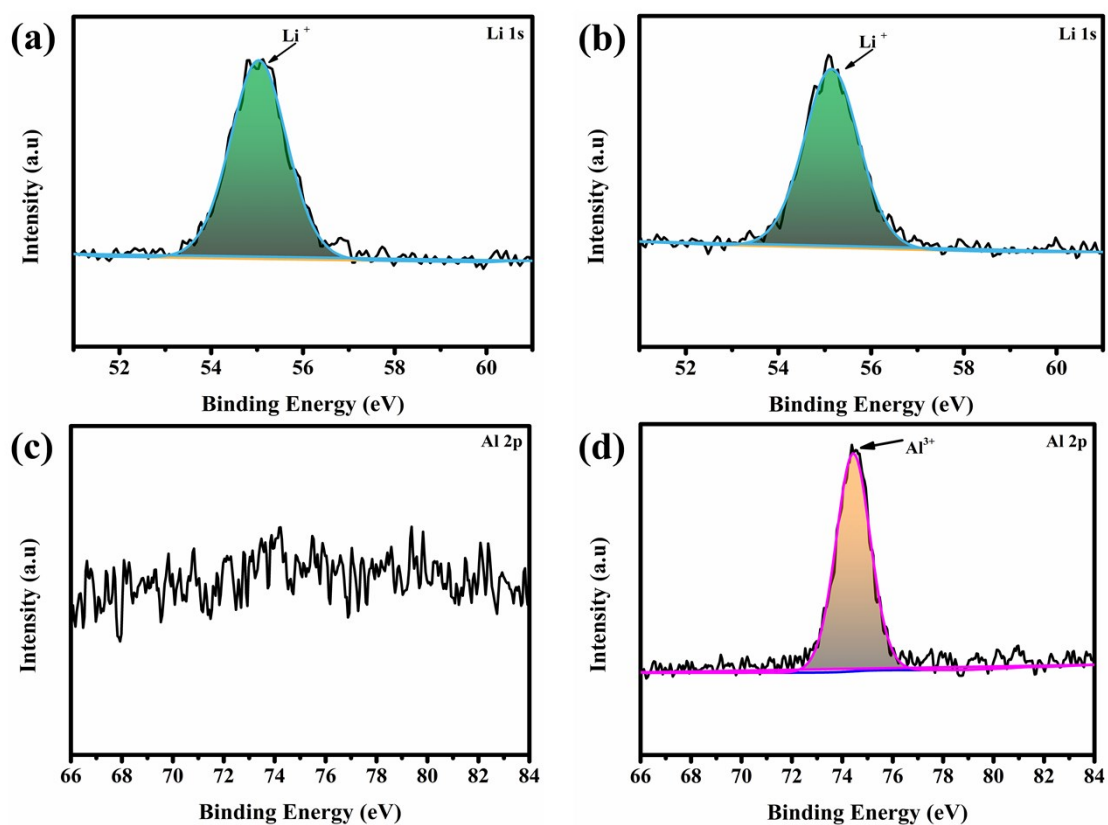

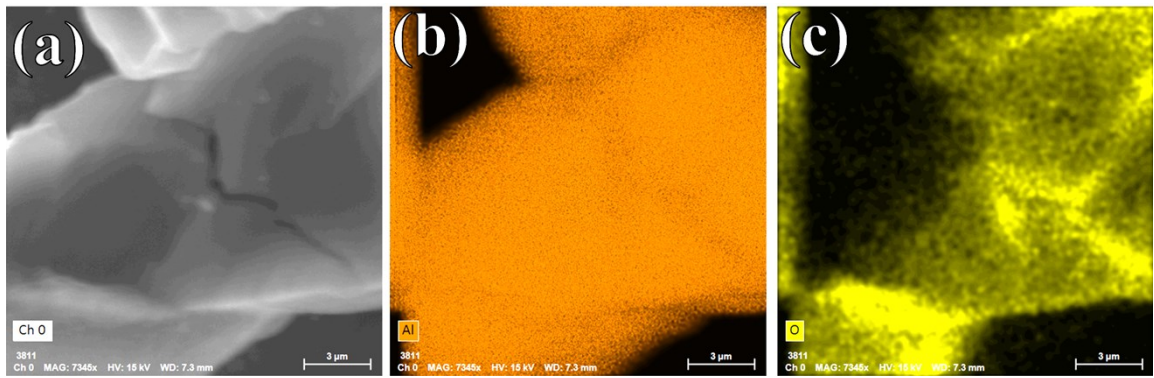

Figure S3. EDS elemental mapping of the Al-31.9%-[<100] alloy.

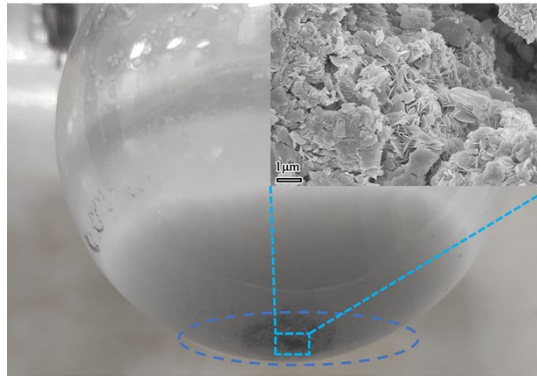

Figure S4. The molten product of the Al-31.9%Li-[<400] during the hydrolysis process and its SEM image was shown in inset.

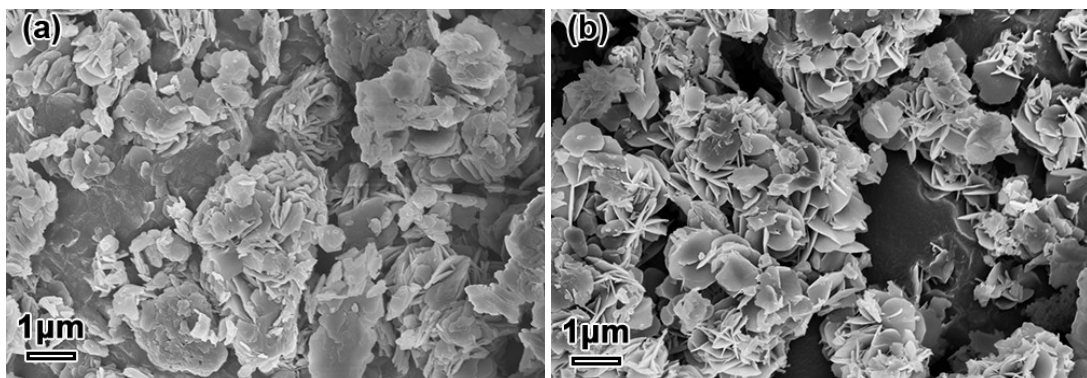

Figure S5. SEM images of the solid hydrolysis by-products of (a) Al-31.9%Li-[<100] and (b) Al-31.9%Li-[<400].

## Reference

1. M. Q. Fan, S. Liu, C. Wang, D. Chen and K. Y. Shu, Hydrolytic Hydrogen Generation Using Milled Aluminum in Water Activated by Li, In, and Zn Additives, *Fuel Cells*, 2012, **12**, 642-648.
2. M.-C. Lin, J.-Y. Uan and T.-C. Tsai, Fabrication of AlLi and Al<sub>2</sub>Li<sub>3</sub>/Al<sub>4</sub>Li<sub>9</sub> intermetallic compounds by molten salt electrolysis and their application for hydrogen generation from water, *International Journal of Hydrogen Energy*, 2012, **37**, 13731-13736.
3. S. Liu, M. Q. Fan, D. Chen and C. J. Lv, The Effect of Composition Design on the Hydrolysis Reaction of Al–Li–Sn Alloy and Water, *Energy Sources, Part A: Recovery, Utilization, and Environmental Effects*, 2015, **37**, 356-364.
4. J. Chen, F. Xu, L. Sun, K. Zhang, Y. Xia, X. Guo, H. Zhang, F. Yu, E. Yan, H. Peng, P. Huang, S. Qiu, C. Xiang and Y. Sun, Effect of doped Ni-Bi-B alloy on hydrogen generation performance of Al-InCl<sub>3</sub>, *Journal of Energy Chemistry*, 2019, **39**, 268-274.
5. C. Chen, B. Lan, K. Liu, H. Wang, X. Guan, S. Dong and P. Luo, A novel aluminum/bismuth subcarbonate/salt composite for hydrogen generation from tap water, *Journal of Alloys and Compounds*, 2019, **808**.
6. C. Zhao, F. Xu, L. Sun, J. Chen, X. Guo, E. Yan, F. Yu, H. Chu, H. Peng, Y. Zou, Z. Liu and F. Li, A novel Al BiOCl composite for hydrogen generation from water, *International Journal of Hydrogen Energy*, 2019, **44**, 6655-6662.
7. C. Wei, D. Liu, S. Xu, T. Cui, Q. An, Z. Liu and Q. Gao, Effects of Cu additives on the hydrogen generation performance of Al-rich alloys, *Journal of Alloys and Compounds*, 2018, **738**, 105-110.
8. S. Prabu and H.-W. Wang, Enhanced hydrogen generation from graphite-mixed aluminum hydroxides catalyzed Al/water reaction, *International Journal of Hydrogen Energy*, 2020, **45**, 33419-33429.
9. C. Chen, X. Guan, H. Wang, S. Dong and P. Luo, Hydrogen generation from splitting water with Al–Bi(OH)<sub>3</sub> composite promoted by NaCl, *International Journal of Hydrogen Energy*, 2020, **45**, 13139-13148.
